# Supplementary material for: Gene Expression Profiling of Cutaneous Injured and Non-Injured Nociceptors in SNI Animal Model of Neuropathic Pain
Source: PubMed Central journal article supplement (PMC5570923; doi:10.1038/s41598-017-08865-3), 2017-08-24
Supplement: 41598_2017_8865_MOESM1_ESM.pdf [file 41598_2017_8865_MOESM1_ESM.pdf]

# GENE EXPRESSION PROFILING OF CUTANEOUS INJURED AND NON-INJURED NOCICEPTORS IN SNI ANIMAL MODEL OF NEUROPATHIC PAIN

Temugin Berta, Florence E. Perrin, Marie Pertin, Raquel Tonello, Yen-Chin Liu, Alex Chamessian, Ann C. Kato, Ru-Rong Ji, and Isabelle Decosterd

Supplementary Figures 1-3

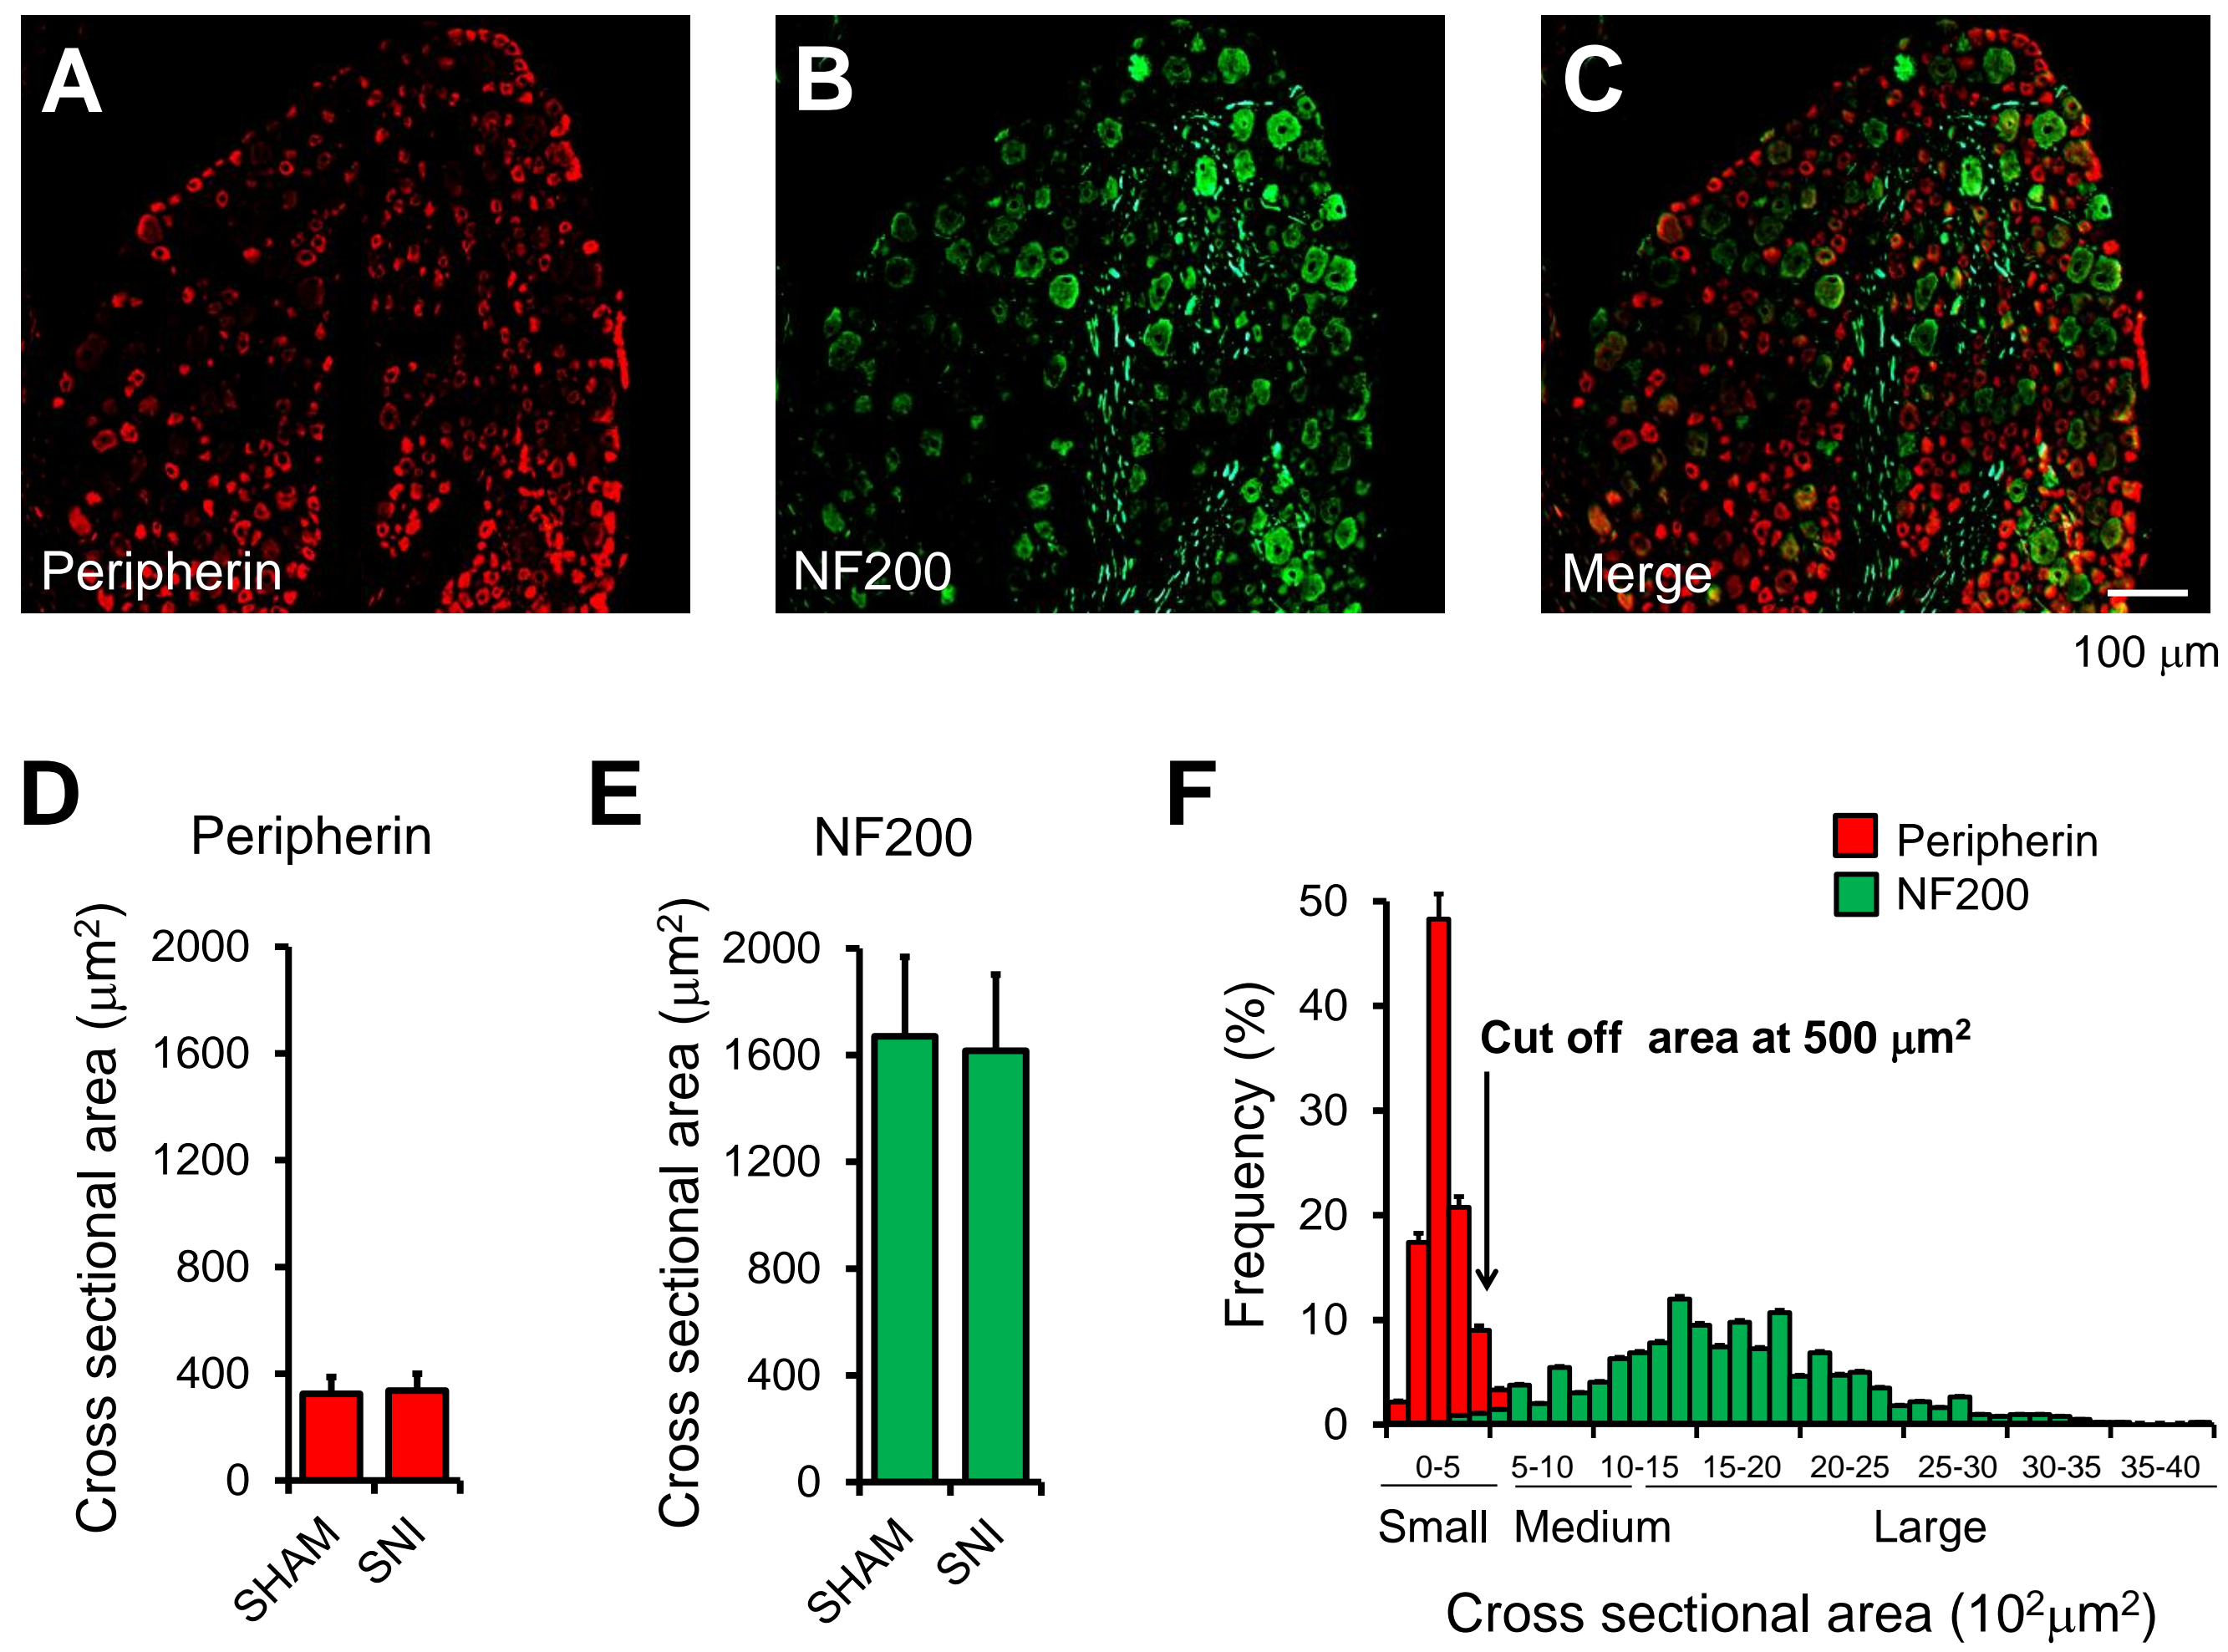

**Supplementary Fig. 1: Definition of the cell size criteria for the LCM of nociceptors.** Immunohistochemistry of fresh DRG tissue for **(A)** nociceptor marker peripherin, **(B)** large-sized neuron marker NF-200 and **(C)** merged figures (scale bars =  $100 \mu\text{m}$ ). Analysis of average cross-sectional area for **(D)** peripherin and **(E)** NF-200 in L4-L5 sections issued from 1 week SNI or sham animals. To note no significant differences were detected between the two surgeries. **(F)** Analysis of the cross-sectional area distribution for the peripherin- and NF-200-positive neurons reveal an optimal cut off cross-sectional area of  $500 \mu\text{m}^2$ , within 90% of neurons were peripherin positive and only 5% were NF-200 positive.

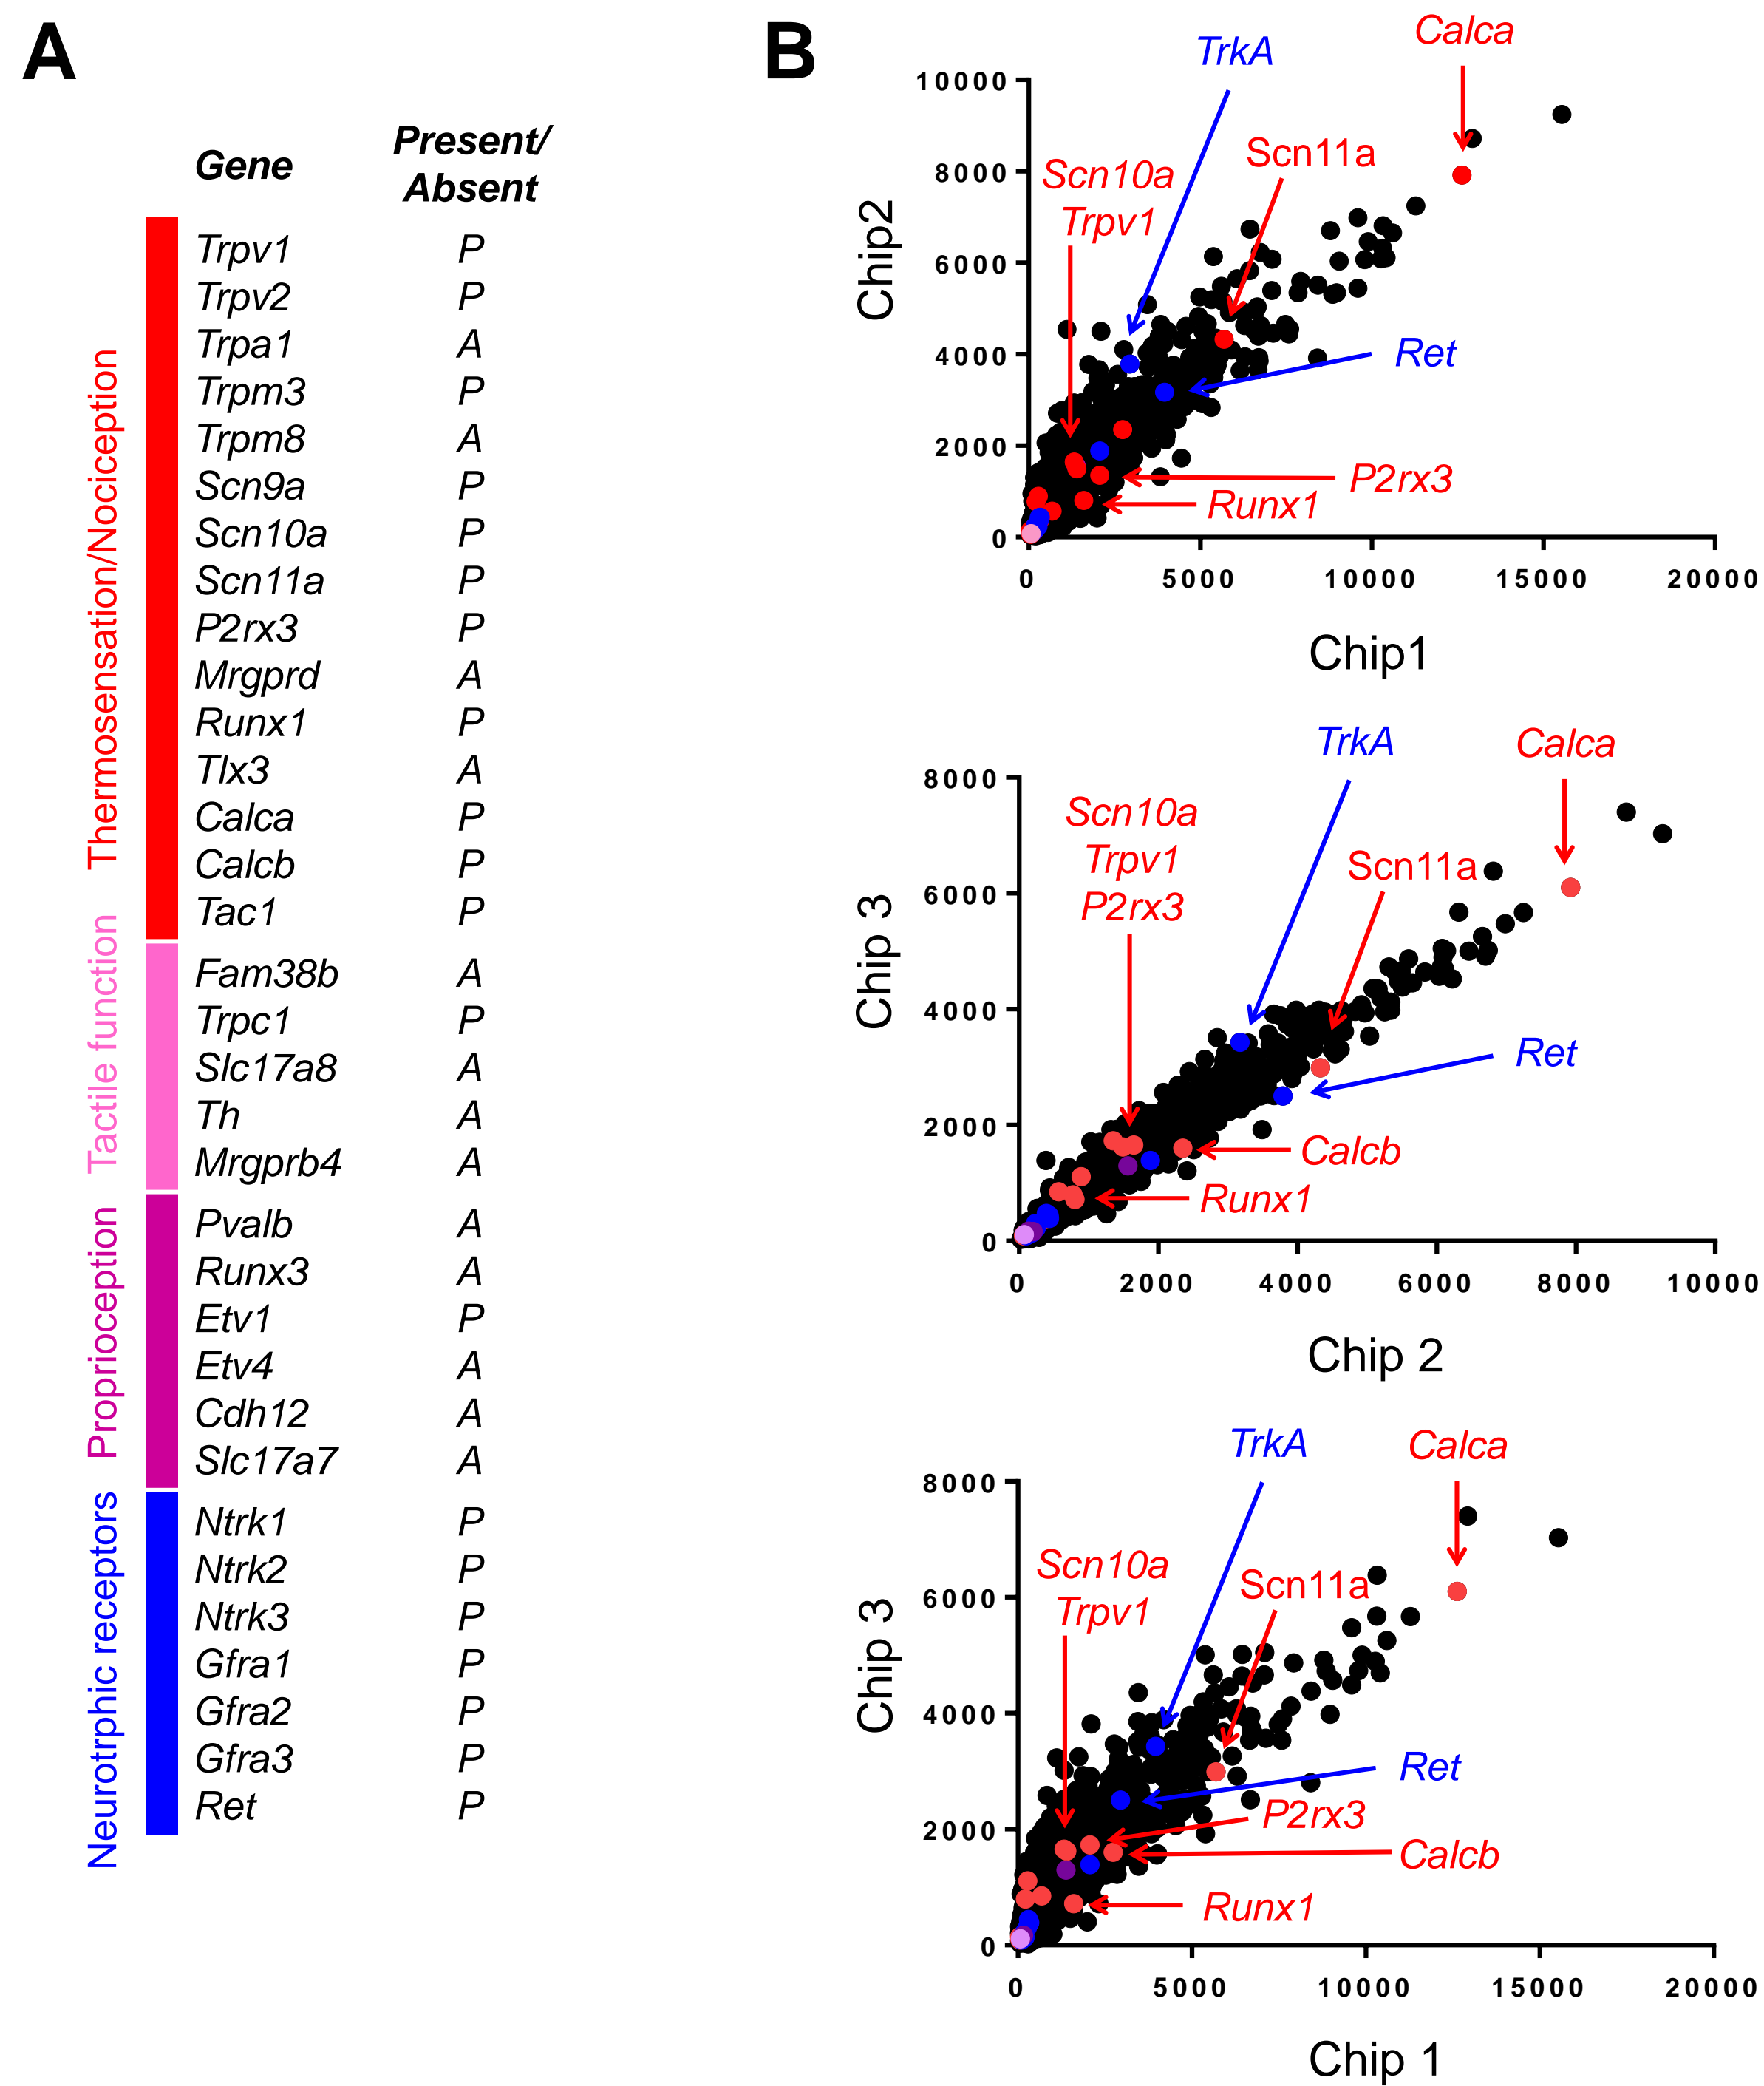

**Supplementary Fig. 2: Expression of somatosensation markers on microarray analysis from LCM samples.**

**(A)** Analysis of transcript levels for known somatosensory mediators (list modified from Chiu *et al.* (ref)) in LCM samples from sham condition shows the presence of several markers for thermosensation and nociception. **(B)** Scatter plots of top 5% genes on the microarrays for the sham condition reveal the high expression of typical nociceptive markers, such as *Calca* (CGRP), *Scn11a* (Na<sub>v</sub>1.9) and *Trpv1*.

Up-regulated genes

| Fold | Non-injured | Injured |
|------|-------------|---------|
| > 2  | 15          | 422     |
| > 5  | 3           | 91      |
| > 10 | 0           | 33      |

Down-regulated genes

| Fold | Non-injured | Injured |
|------|-------------|---------|
| > 2  | 6           | 180     |
| > 5  | 0           | 7       |
| > 10 | 0           | 0       |

**Supplementary Fig. 3: Fold change of regulated gene.** Number of up-regulated and down-regulated genes per conditions compared to sham and classified by fold change (for statistic see method section).
